# Supplementary material for: Interface reacted ZnFe2O4 on α-Fe2O3 nanoarrays for largely improved photoelectrochemical activity
Source: Royal Society of Chemistry journal article supplement (doi:10.1039/c5ra15596g), 2015-01-01
Supplement: c5ra15596g1.pdf [file c5ra15596g1.pdf]

## Supporting Information

### Interface Reacted $\text{ZnFe}_2\text{O}_4$ on $\alpha\text{-Fe}_2\text{O}_3$ Nanoarrays for Largely Improved Photoelectrochemical Activity

Qiong Liu, Fengren Cao, Fangli Wu, Wei Tian\* and Liang Li\*

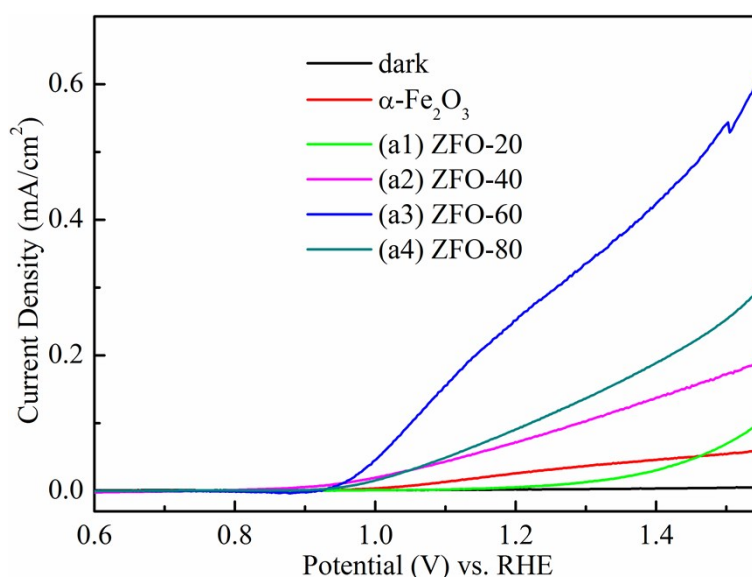

**Fig. S1** Variation of Photocurrent density vs bias potential (vs. RHE) ( $J$ - $V$ ) with different thickness of ZnO layer under AM 1.5 G illumination and in the dark. (a1) 20 nm, (a2) 40 nm, (a3) 60 nm, (a4) 80 nm.

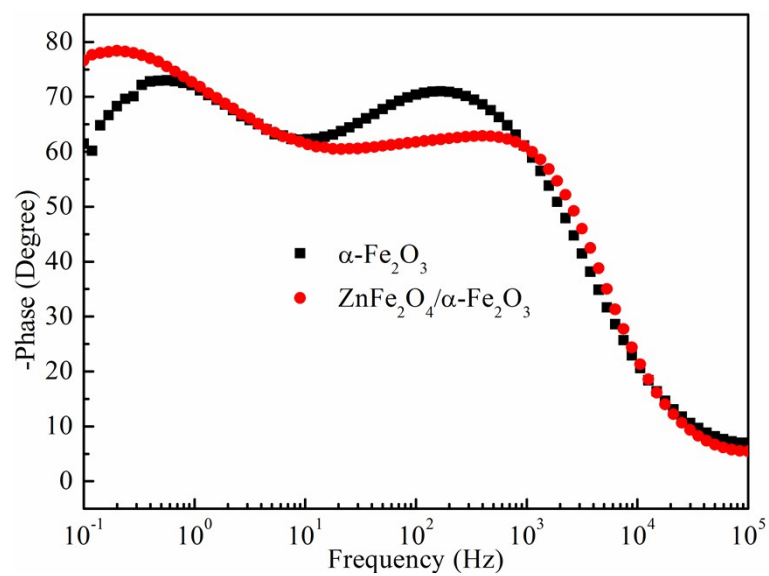

**Fig. S2** Bode phase plots of pristine  $\alpha\text{-Fe}_2\text{O}_3$  nanorod arrays and  $\text{ZnFe}_2\text{O}_4/\alpha\text{-Fe}_2\text{O}_3$  composite nanorod arrays under light.

**Table S1** The comparative PEC performances of our work with other previous reports on ZnFe<sub>2</sub>O<sub>4</sub>/Fe<sub>2</sub>O<sub>3</sub>. The photocurrent densities were all measured at 1.23 V vs RHE.

| Reference | Photocurrent Density (mA cm <sup>-2</sup> ) |                                                                  | Enhancement (%) |
|-----------|---------------------------------------------|------------------------------------------------------------------|-----------------|
|           | Fe <sub>2</sub> O <sub>3</sub>              | ZnFe <sub>2</sub> O <sub>4</sub> /Fe <sub>2</sub> O <sub>3</sub> |                 |
| 16        | 0.009                                       | 0.05                                                             | 456             |
| 11        | 0.18                                        | 0.23                                                             | 28              |
| 20        | 0.25                                        | 0.45                                                             | 80              |
| Our Work  | 0.03                                        | 0.28                                                             | 833             |
